# Supplementary material for: Regulation of PDE5 expression in human aorta and thoracic aortic aneurysms
Source: PubMed Central journal article supplement (PMC6704119; doi:10.1038/s41598-019-48432-6), 2019-08-21

# Regulation of PDE5 expression in human aorta and thoracic aortic aneurysms

A

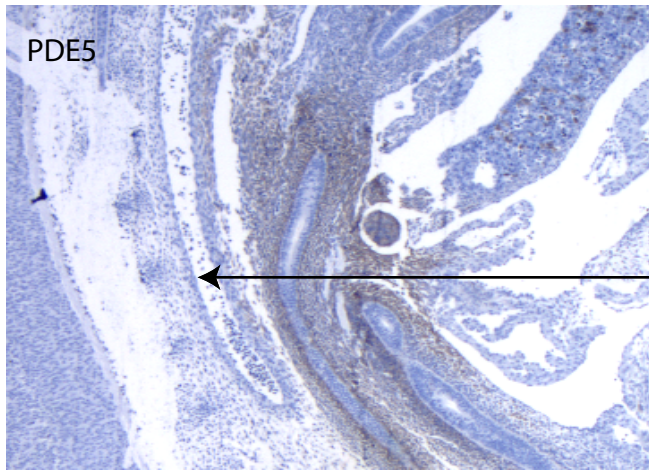

Valeriana Cesarini  
Calogera Pisano  
Gabriele Rossi  
Carmela Rita Balistreri  
Flavia Botti  
Giorgio Antonelli  
Giovanni Ruvolo  
Emmanuele A. Jannini  
Susanna Dolci

B

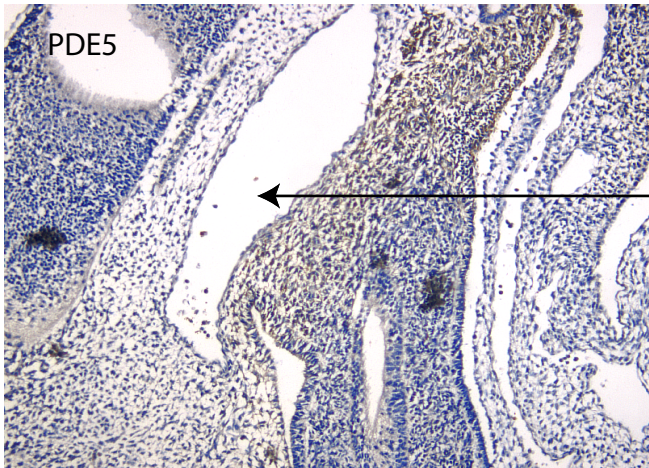

C

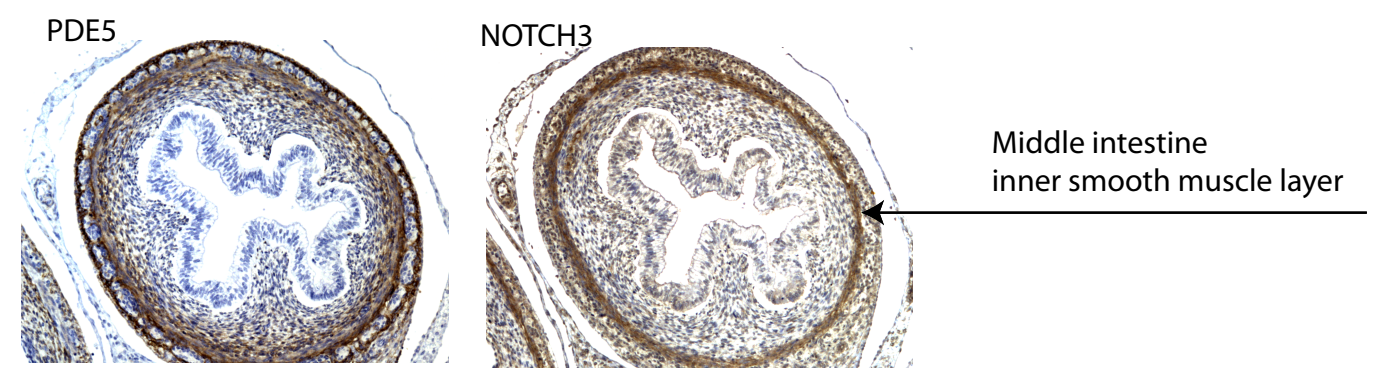

D

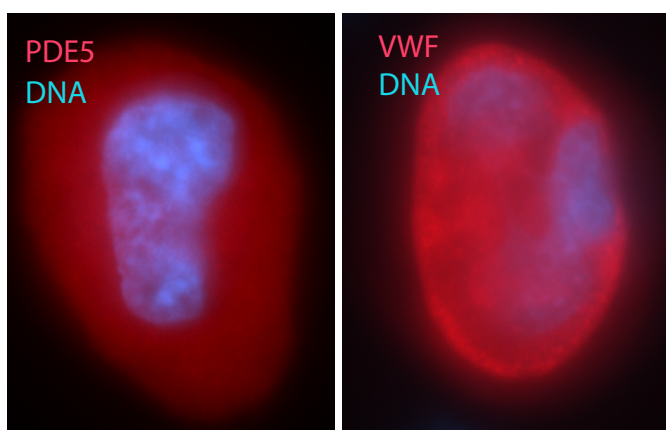

E

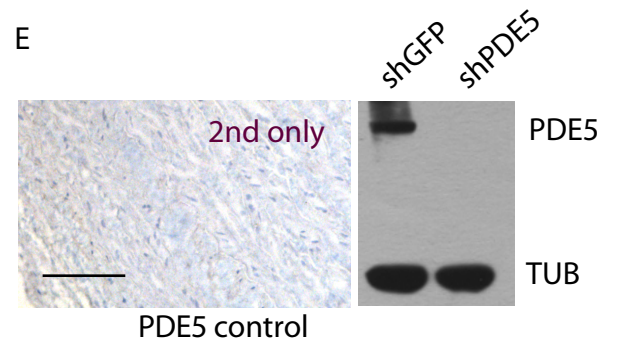

Supplement: 41598_2019_48432_MOESM1_ESM.pdf [file 41598_2019_48432_MOESM1_ESM.pdf]
